# Supplementary material for: Constructing perfect cubic Ag–Cu alloyed nanoclusters through selective elimination of phosphine ligands
Source: Royal Society of Chemistry journal article supplement (doi:10.1039/d3cp04224c), 2023-12-12
Supplement: d3cp04224c1.pdf [file d3cp04224c1.pdf]

## Electronic Supplementary Information

### **Constructing Perfect Cubic Ag-Cu Alloyed Nanoclusters through Selective Elimination of Phosphine Ligands**

Li Tang,<sup>a,†</sup> Qikai Han,<sup>a,†</sup> Bin Wang<sup>a</sup>, Zhonghua Yang,<sup>b</sup> Chunyuan Song,<sup>a</sup> Guanyu Feng,<sup>a</sup> and Shuxin Wang<sup>\*a</sup>

<sup>a</sup>*College of Materials Science and Engineering, Qingdao University of Science and Technology, Qingdao 266042, P. R. China.*

<sup>b</sup> *College of Chemistry and Molecular Engineering, Qingdao University of Science and Technology, Qingdao 266042, P. R. China.*

\*E-mail of corresponding author: shuxin\_wang@qust.edu.cn

## Table of Contents

### Section 1. Experimental Procedures

Characterization

Materials and Synthesis

### Section 2. Supplementary Figures

Fig. S1 An optical microscopic image of the single crystals of  $\text{Ag}_{55}\text{Cu}_8\text{I}_{12}$ .

Fig. S2 X-ray photoelectron spectroscopy (XPS) of  $\text{Ag}_{55}\text{Cu}_8\text{I}_{12}$ .

Fig. S3 SEM image and energy-dispersive X-ray spectrum(EDX) of  $\text{Ag}_{55}\text{Cu}_8\text{I}_{12}$ .

Fig. S4 The thermogravimetric analysis (TGA) results of  $\text{Ag}_{55}\text{Cu}_8\text{I}_{12}$  under a  $\text{N}_2$  atmosphere.

Fig. S5  $^{31}\text{P}$ -NMR spectrum of  $\text{Ag}_{55}\text{Cu}_8\text{I}_{12}$ .

Fig. S6  $^1\text{H}$ -NMR spectrum of  $\text{Ag}_{55}\text{Cu}_8\text{I}_{12}$ .

Fig. S7  $^1\text{H}$ -NMR spectrum of  $\text{PPh}_4\text{Br}$ .

Fig. S8 Energy scale spectra of (a)  $\text{Ag}_{55}\text{Cu}_8\text{I}_{12}$  and (b)  $\text{Ag}_{63}$ .

Fig. S9 The overall structure of the  $\text{Ag}_{55}\text{Cu}_8\text{I}_{12}$ .

Fig. S10 Comparing the deviations in the edges of the cubic structures between  $\text{Ag}_{55}\text{Cu}_8\text{I}_{12}$  and  $\text{Ag}_{63}$ .

Fig. S11 UV-Vis spectra of 1,2-dichloroethane solutions of  $\text{Ag}_{55}\text{Cu}_8\text{I}_{12}$  heated in air at  $50^\circ\text{C}$  for different times.

Fig. S12 Packing of the  $\text{Ag}_{55}\text{Cu}_8\text{I}_{12}$  and  $\text{Ag}_{63}$  in crystal lattices.

### Section 3. Supplementary Tables

Table S1 Crystal data and structure refinement for the  $\text{Ag}_{55}\text{Cu}_8\text{I}_{12}$ .

Table S2 The atomic ratio of Ag and Cu in  $\text{Ag}_{55}\text{Cu}_8\text{I}_{12}$  was calculated from XPS, ICP and EDX measurements.

Table S3 Comparison of different bond lengths in  $\text{Ag}_{55}\text{Cu}_8\text{I}_{12}$  and  $\text{Ag}_{63}$  crystal structures.

Table S4 Comparing the bond lengths deviations on the edges of the cubic structures between  $\text{Ag}_{55}\text{Cu}_8\text{I}_{12}$  and  $\text{Ag}_{63}$ .

Table S5 Comparing the angular deviations on the edges of the cubic structures between  $\text{Ag}_{55}\text{Cu}_8\text{I}_{12}$  and  $\text{Ag}_{63}$ .

### Section 4. References

# 1. Experimental Procedures

## Characterization

The UV-Vis absorption spectra of nanoclusters were performed on UV-8000 spectrophotometer. X-ray photoelectron spectroscopy (XPS) measurements were acquired on an ESCALAB XI+, with a mono chromate AlK $\alpha$  (1486.8 eV) 150 W X-ray source, 0.5 mm circular spot size, a flood gun to counter charging effects, and analysis chamber base pressure lower than  $1 \times 10^{-9}$  mbar. A Scanning Electron Microscope (SEM) analysis was performed using an S-4800 microscope, which operated within an accelerating voltage range of 0.1-30 kV. Nuclear magnetic resonance (NMR) measurements were performed on a Bruker Avance II spectrometer. For  $^1\text{H}$  and  $^{31}\text{P}$  NMR,  $\text{CD}_2\text{Cl}_2$  was used as the solvent to dissolve all crystal samples. Inductively coupled plasma atomic emission spectrometry (ICP-AES) measurements were collected on an AtomScan Advantage instrument made by Thermo Jerrrell Ash Corporation. Thermo gravimetric analysis (TGA) was carried out on ST 8000, 5 mg of the nanocluster at a heating rate of  $10 \text{ K min}^{-1}$  from room temperature to 773.15K.

The SC-XRD data of the  $\text{Ag}_{55}\text{Cu}_8\text{I}_{12}$  nanoclusters was collected using a Bruker D8 QUEST X-ray single-crystal diffractometer with Mo K $\alpha$  radiation ( $\lambda = 0.71073 \text{ \AA}$ ) at 170K. The nanocluster structures were solved using the ShelXT structure solution program via intrinsic phasing in Olex2. Subsequently, the full matrix least squares method was used to improve the structure of F $^2$  using the SHELXTL software package.

## Materials

Silver nitrate ( $\text{AgNO}_3$ ;  $\geq 99.99\%$ ; metal basis), copper iodide ( $\text{CuI}$ ;  $>99.99\%$ , metal basis), Triphenylphosphine ( $\text{PPh}_3$ , 99%), Tetraphenyl phosphorus bromide ( $\text{BrPPh}_3$ ; 99%), 2,4-dimethylbenzenethiol ( $\text{HS-C}_6\text{H}_3^{2,4}(\text{CH}_3)_2$ ; 98%), sodium borohydride ( $\text{NaBH}_4$ ;  $\geq 99\%$ , Aldrich), triethylamine ( $\text{C}_6\text{H}_{15}\text{N}$ ,  $\geq 99\%$ , Aldrich), *n*-hexane ( $\text{C}_6\text{H}_{14}$ , Hex;  $\geq 99\%$ , Aldrich), dichloromethane ( $\text{CH}_2\text{Cl}_2$ ;  $\geq 99\%$ , Aldrich) and methanol ( $\text{CH}_3\text{OH}$ ;  $\geq 99\%$ , Aldrich) were used in the experiments. All chemicals are commercially available and used as received.

## Synthesis of the $\text{Ag}_{55}\text{Cu}_8\text{I}_{12}$ nanocluster

The preparation of  $\text{Ag}_{55}\text{Cu}_8\text{I}_{12}$  was based on the method reported by Zheng's group with minor modifications.<sup>[S1]</sup>  $\text{AgNO}_3$  (40 mg) was dissolved in a mixture solution containing 3 mL of methanol and 10 mL of  $\text{CH}_2\text{Cl}_2$  under vigorously stirred. After stirring for 2 minutes, 50 mg of  $\text{PPh}_3$ , 20 mg of  $\text{PPh}_4\text{Br}$ , and 163  $\mu\text{L}$  of 2, 4-dimethylbenzenethiol ( $\text{HS-C}_6\text{H}_3^{2,4}(\text{CH}_3)_2$ ) was added to the reaction mixture in turn, which was vigorously stirred for an additional 15 minutes.  $\text{CuI}$  (25 mg) was introduced to the reaction solution. A freshly prepared solution of  $\text{NaBH}_4$  (160 mg) and 100  $\mu\text{L}$  of triethylamine dissolved in 2 mL of ice-cold pure water was quickly added to the reaction mixture, causing the light yellow solution to immediately darken. The reaction was allowed to proceed for 12 hours. Finally, the solution was concentrated to 4 mL using a rotary evaporator and washed multiple times with excess MeOH to remove excess thiolate. This extraction process was repeated several times. The resulting solution was then centrifuged to obtain a solid precipitate, which was dissolved in  $\text{CH}_2\text{Cl}_2$ , resulting in a solution of  $\text{Ag}_{55}\text{Cu}_8\text{I}_{12}$  nanoclusters. Crystallization was subsequently performed in a mixed solution of  $\text{CH}_2\text{Cl}_2$  and *n*-hexane at  $4^\circ\text{C}$ . After approximately one week (Fig. S1), crystals of  $\text{Ag}_{55}\text{Cu}_8\text{I}_{12}$  were obtained with a yield of approximately 56% based on the silver content.

## 2. Supplementary Figures

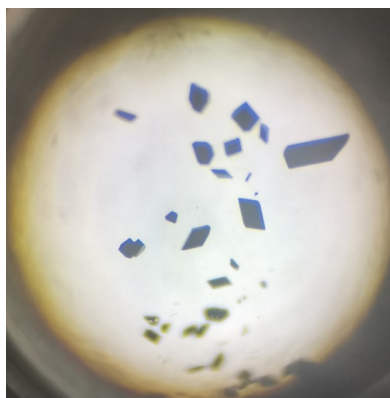

**Fig. S1** An optical microscopic image of the single crystals of  $\text{Ag}_{55}\text{Cu}_8\text{I}_{12}$ .

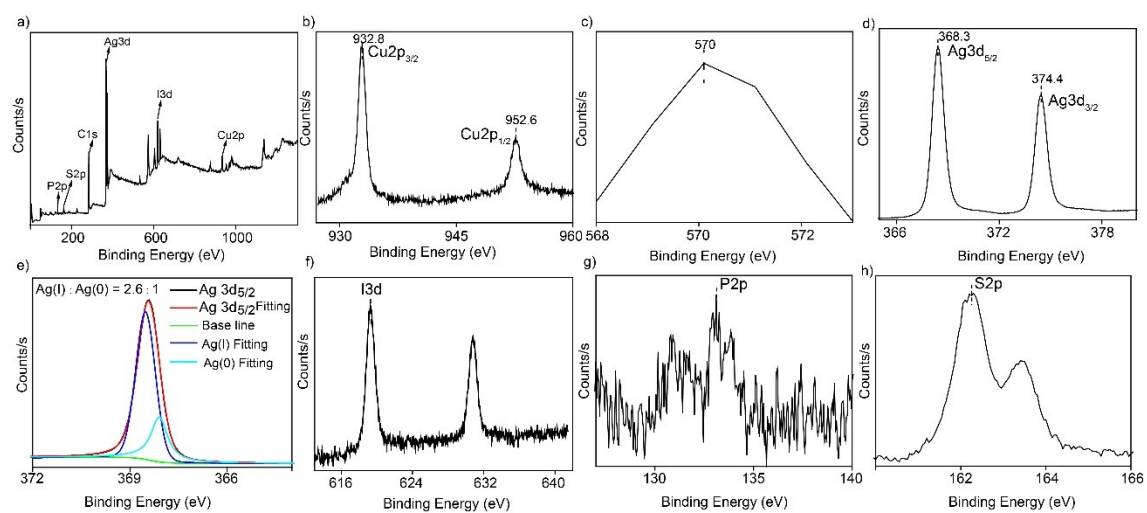

**Fig. S2** X-ray photoelectron spectroscopy (XPS) of  $\text{Ag}_{55}\text{Cu}_8\text{I}_{12}$ . a) XPS, b) Cu 2p, c) Cu LMM, d) Ag 3d, e) XPS of measured Ag  $3d_{5/2}$  (black curve), fitting line of Ag  $3d_{5/2}$  (red curve), base line (green curve), fitting line of Ag (I) (blue curve) and fitting line of Ag (0) (turquoise curve). f) I 3d, g) P 2p, h) S 2p.

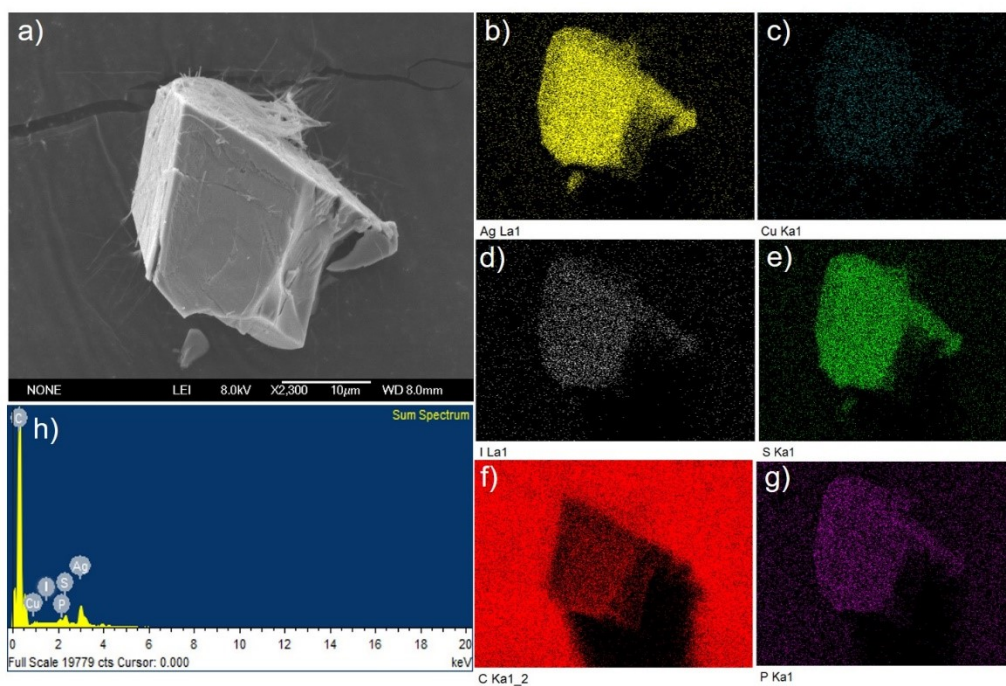

**Fig. S3** (a) SEM image of a small deformed single crystal of  $\text{Ag}_{55}\text{Cu}_8\text{I}_{12}$ . (b-g) are the elemental maps of Ag, Cu, I, S, C, and P, respectively. (h) EDX spectrum, confirming the presence of the above elements in the cluster, which is consistent with the cluster composition obtained by SCXRD data.

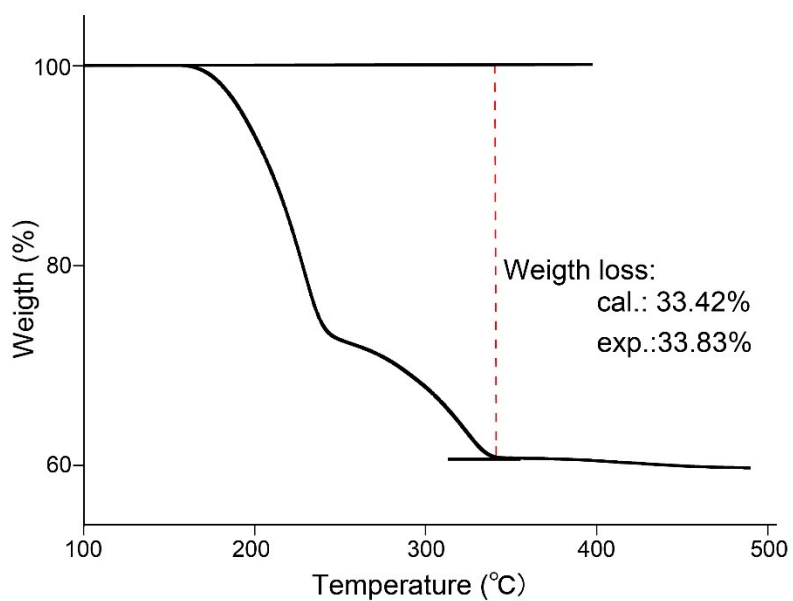

**Fig. S4** The thermogravimetric analysis (TGA) results of  $\text{Ag}_{55}\text{Cu}_8\text{I}_{12}$  under a  $\text{N}_2$  atmosphere.

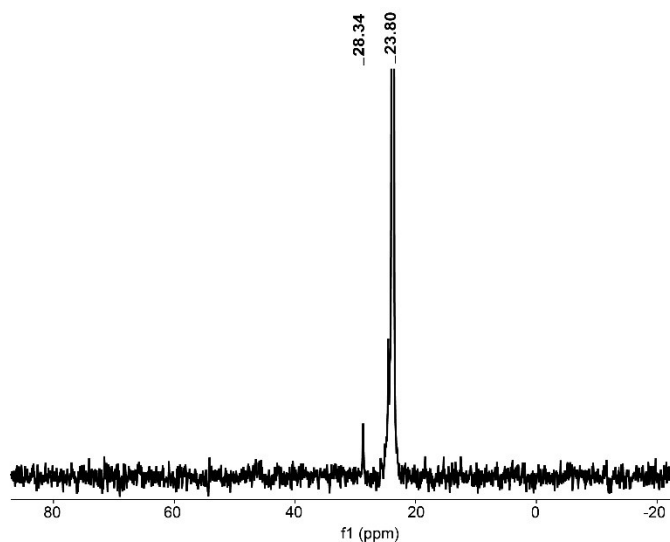

Fig. S5  $^{31}\text{P}$ -NMR spectrum of  $\text{Ag}_{55}\text{Cu}_8\text{I}_{12}$ .

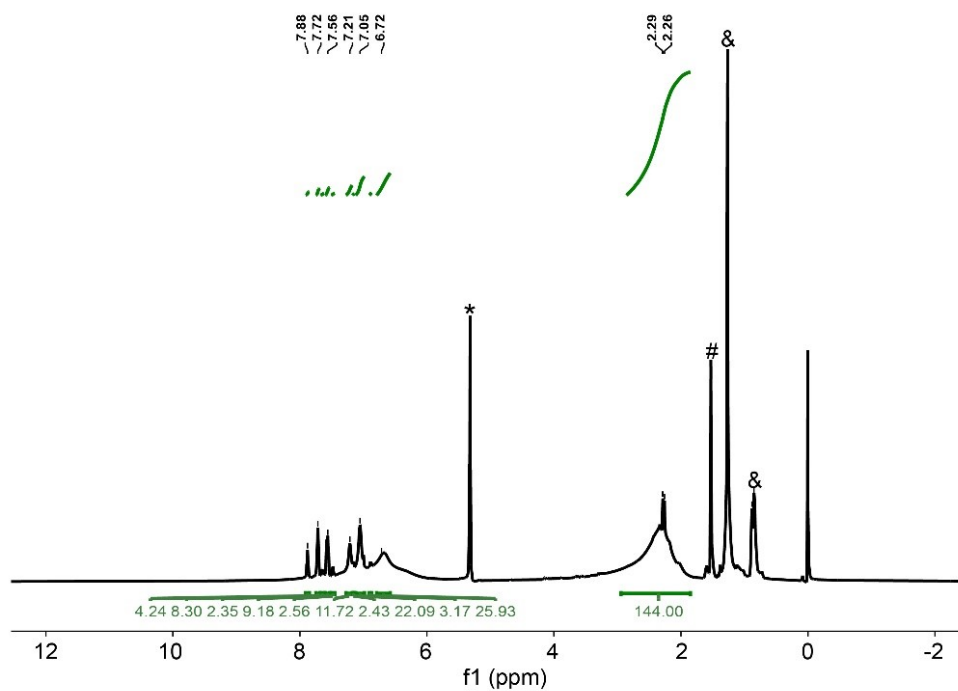

Fig. S6  $^1\text{H}$ -NMR spectrum of  $\text{Ag}_{55}\text{Cu}_8\text{I}_{12}$ . Notes: \* =  $\text{CD}_2\text{Cl}_2$ ; # =  $\text{H}_2\text{O}$ ; & = n-hexane.

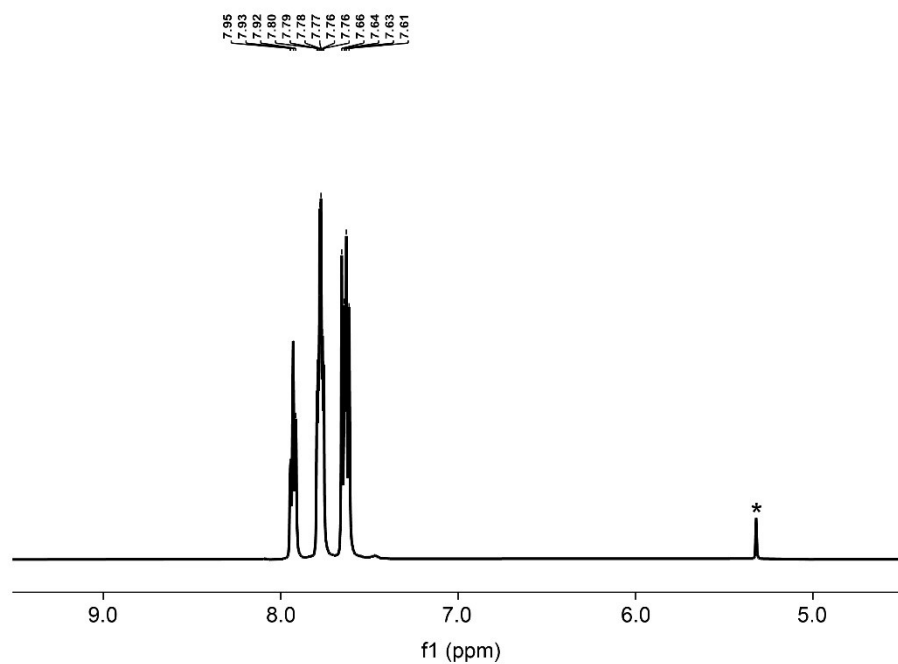

Fig. S7  $^1\text{H-NMR}$  spectrum of  $\text{PPh}_4\text{Br}$ . Notes: \* stands for  $\text{CD}_2\text{Cl}_2$ .

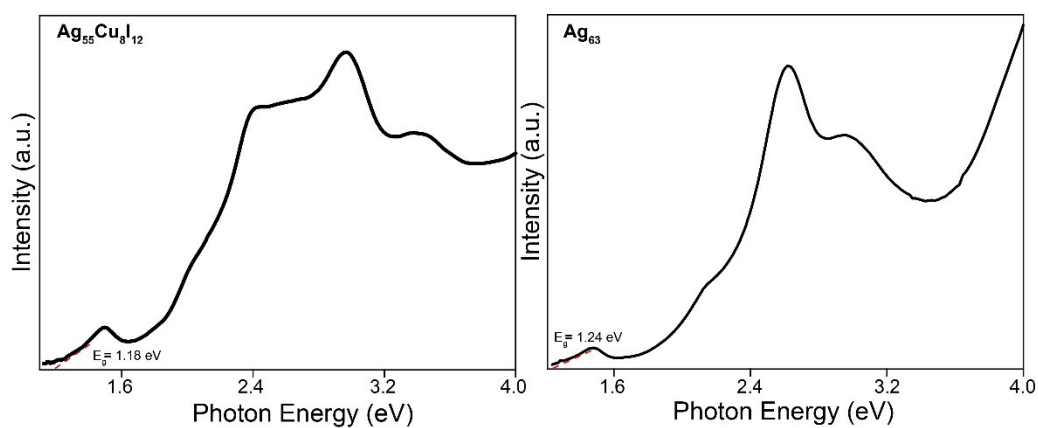

Fig. S8 Energy scale spectra of (a)  $\text{Ag}_{55}\text{Cu}_8\text{I}_{12}$  and (b)  $\text{Ag}_{63}$ .

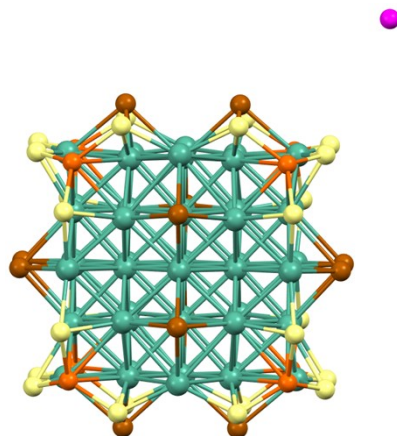

**Fig. S9** The overall structure of the  $\text{Ag}_{55}\text{Cu}_8\text{I}_{12}$ . Color legends: Ag = dark green, Cu = orange, S = yellow, I = brown, P = magenta. For clarity, C and H atoms are all omitted.

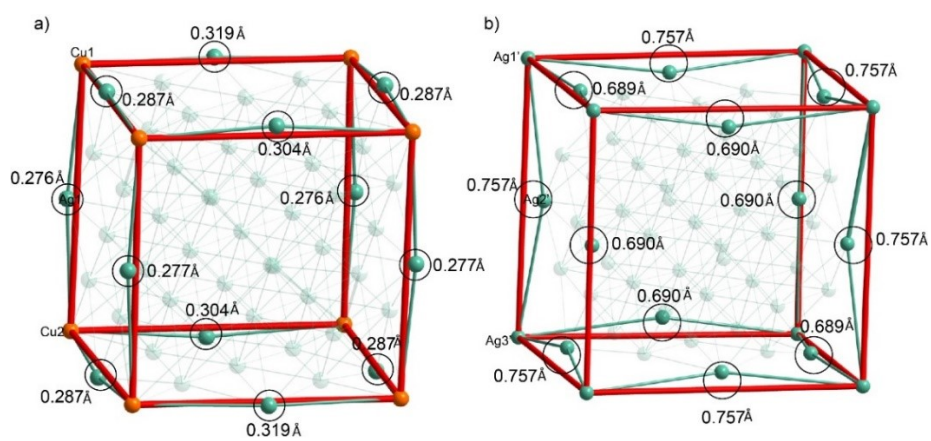

**Fig. S10** Comparing the deviations in the edges of the cubic structures between (a)  $\text{Ag}_{55}\text{Cu}_8\text{I}_{12}$  and (b)  $\text{Ag}_{63}$ .



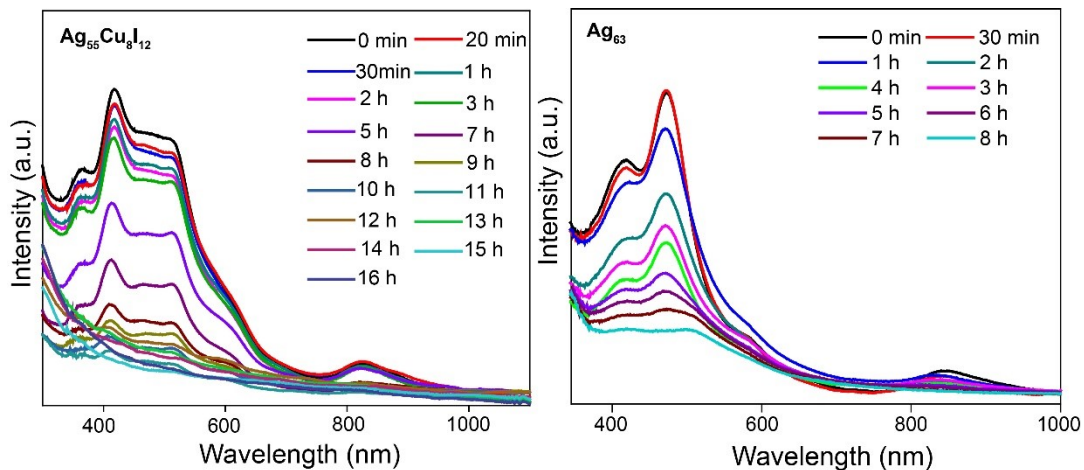

**Fig. S11** UV-Vis spectra of 1,2-dichloroethane solutions of (a)  $\text{Ag}_{55}\text{Cu}_8\text{I}_{12}$  and (b)  $\text{Ag}_{63}$  heated in air at  $50^\circ\text{C}$  for different times.

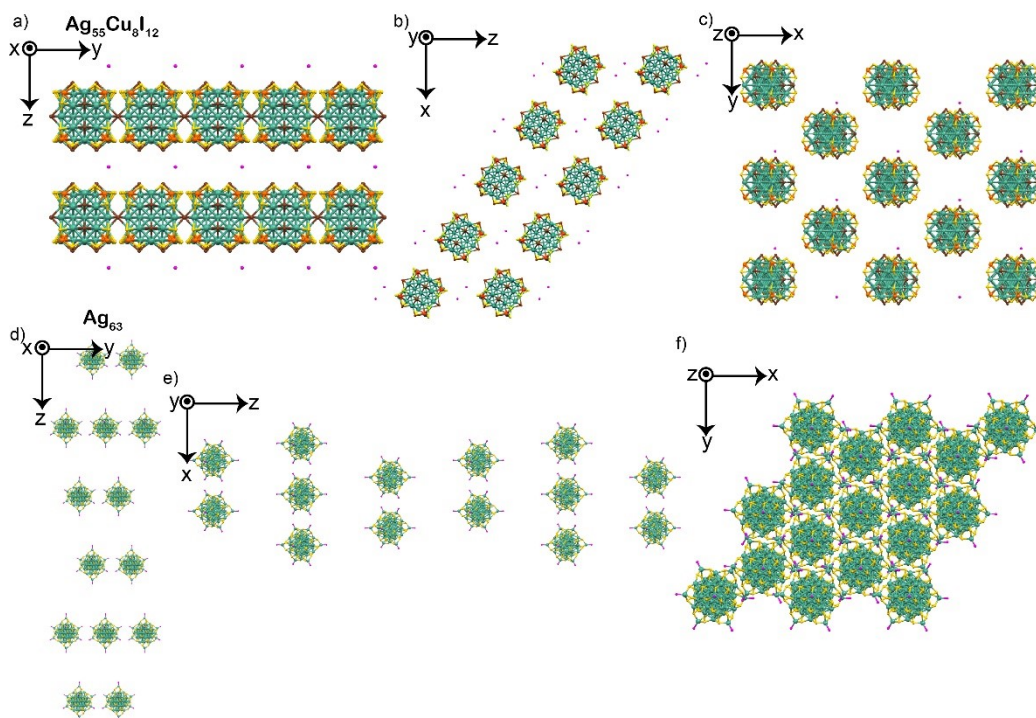

**Fig. S12** Panels (a-c) illustrate the packing of  $\text{Ag}_{55}\text{Cu}_8\text{I}_{12}$  and panels (d-f) show  $\text{Ag}_{63}$  within crystal lattices, viewed from the x-axis (a, d), y-axis (b, e), and z-axis (c, f). The color legend is as follows: Ag in dark green, Cu in orange, S in yellow, I in brown, and P in magenta. For enhanced clarity, carbon and hydrogen atoms have been omitted.

### 3. Supplementary Tables

**Table S1** Crystal data and structure refinement for the **Ag<sub>55</sub>Cu<sub>8</sub>I<sub>12</sub>**.

|                                             |                                                                                                     |
|---------------------------------------------|-----------------------------------------------------------------------------------------------------|
| Empirical formula                           | C <sub>216</sub> H <sub>236</sub> Ag <sub>55</sub> I <sub>12</sub> Cu <sub>8</sub> PS <sub>24</sub> |
| Formula weight                              | 11596.41                                                                                            |
| Temperature/K                               | 170                                                                                                 |
| Crystal system                              | monoclinic                                                                                          |
| Space group                                 | C2/m                                                                                                |
| Unit cell dimensions                        | a = 37.341(5) Å    α = 90 °<br>b = 24.083(3) Å    β = 125.295(2) °<br>c = 22.341(3)      γ = 90°    |
| Volume/Å <sup>3</sup>                       | 16398(4)                                                                                            |
| Z                                           | 2                                                                                                   |
| ρ calcd/cm <sup>3</sup>                     | 2.349                                                                                               |
| μ /mm <sup>-1</sup>                         | 5.023                                                                                               |
| F(000)                                      | 10768.0                                                                                             |
| Crystal size/mm <sup>3</sup>                | 0.07 × 0.05 × 0.05                                                                                  |
| Radiation                                   | MoKα (λ = 0.71073)                                                                                  |
| 2θ range for data collection/°              | 4.084 to 52.778                                                                                     |
| Index ranges                                | -46 ≤ h ≤ 41, -30 ≤ k ≤ 29, -27 ≤ l ≤ 27                                                            |
| Reflections collected                       | 35734                                                                                               |
| Independent reflections                     | 16890 [Rint = 0.0635, Rsigma = 0.0935]                                                              |
| Data/restraints/parameters                  | 16890/3224/1162                                                                                     |
| Goodness-of-fit on F <sup>2</sup>           | 0.925                                                                                               |
| Final R indexes [I ≥ 2σ (I)]                | R <sub>1</sub> = 0.0710, wR <sub>2</sub> = 0.1992                                                   |
| Final R indexes [all data]                  | R <sub>1</sub> = 0.1541, wR <sub>2</sub> = 0.2576                                                   |
| Largest diff. peak/hole / e Å <sup>-3</sup> | 2.13/-0.79                                                                                          |

**Table S2** The atomic ratio of Ag and Cu in  $\text{Ag}_{55}\text{Cu}_8\text{I}_{12}$  was calculated from X-ray photoelectric spectroscopy (XPS), inductively coupled plasma (ICP) and energy-dispersive X-ray spectrum (EDX) measurements.

| Measurement         | Ag(%)        | Cu(%)      |
|---------------------|--------------|------------|
| XPS results         | 86.9         | 13.1       |
| ICP results         | 87.2         | 12.8       |
| EDX results         | 86.5         | 13.5       |
| Theoretical results | 55/63 (87.3) | 8/63(12.7) |

**Table S3** Comparison of different bond lengths in  $\text{Ag}_{55}\text{Cu}_8\text{I}_{12}$  and  $\text{Ag}_{63}$  crystal structures.

| Cluster<br>Bond length (Å) | $\text{Ag}_{55}\text{Cu}_8\text{I}_{12}$ |       |         | $\text{Ag}_{63}$ |       |         |
|----------------------------|------------------------------------------|-------|---------|------------------|-------|---------|
|                            | min.                                     | max.  | average | min.             | max.  | average |
| Ag(C)-Ag(SS)               | 2.883                                    | 2.886 | 2.885   | 2.878            | 2.897 | 2.886   |
| Ag(SS)-Ag(SS)              | 2.877                                    | 2.893 | 2.886   | 2.845            | 2.963 | 2.886   |
| Ag(SS)-Ag(S)               | 2.806                                    | 3.152 | 2.904   | 2.835            | 3.267 | 2.938   |
| Ag(S)-Ag(S)                | 2.811                                    | 3.241 | 2.953   | 2.852            | 3.178 | 2.982   |
| Ag-Cu                      | 2.85                                     | 3.003 | 2.904   | -                | -     | -       |
| Cu-S                       | 2.24                                     | 2.325 | 2.287   | -                | -     | -       |
| Ag-I                       | 2.826                                    | 2.968 | 2.894   | -                | -     | -       |
| Ag-S                       | 2.461                                    | 2.739 | 2.581   | 2.495            | 2.74  | 2.587   |
| Ag-P                       | -                                        | -     | -       | 2.394            | 2.406 | 2.392   |

Notes:

Ag(S) stands for the surface silver atom covered by thiolate;

Ag(SS) stands for the subsurface Ag atom adjacent to the surface Ag atom;

Ag(C) stands for the central Ag atom.

**Table S4** Comparing the bond length deviations on the edges of the cubic structures between **Ag<sub>55</sub>Cu<sub>8</sub>I<sub>12</sub>** and **Ag<sub>63</sub>**.

| Cluster<br>Bond length (Å) | Ag <sub>55</sub> Cu <sub>8</sub> I <sub>12</sub> | Ag <sub>63</sub> | Ag <sub>55</sub> Cu <sub>8</sub> I <sub>12</sub> | Ag <sub>63</sub>       |
|----------------------------|--------------------------------------------------|------------------|--------------------------------------------------|------------------------|
|                            |                                                  |                  | diff. (Å)                                        | diff. (Å)              |
|                            |                                                  |                  | i.e. 4.122+3.998-8.01                            | i.e. 4.838+4.796-9.514 |
| Cu1-Ag1 (Ag1'-Ag2')        | 4.122                                            | 4.838            | 0.019                                            | 0.12                   |
| Ag1-Cu2 (Ag2'-Ag3')        | 3.998                                            | 4.796            |                                                  |                        |
| Cu1-Cu2 (Ag1'-Ag3')        | 8.101                                            | 9.514            |                                                  |                        |
| Cu7-Ag7 (Ag13'-Ag14')      | 4.122                                            | 4.838            | 0.019                                            | 0.12                   |
| Ag7-Cu8 (Ag14'-Ag15')      | 3.998                                            | 4.796            |                                                  |                        |
| Cu7-Cu8 (Ag13'-Ag15')      | 8.101                                            | 9.514            |                                                  |                        |
| Cu1-Ag4 (Ag1'-Ag8')        | 4.006                                            | 4.953            | 0.02                                             | 0.097                  |
| Ag4-Cu4 (Ag8'-Ag7')        | 4.204                                            | 4.795            |                                                  |                        |
| Cu1-Cu4 (Ag1'-Ag7')        | 8.19                                             | 9.651            |                                                  |                        |
| Cu2-Ag2 (Ag3'-Ag4')        | 4.006                                            | 4.838            | 0.02                                             | 0.12                   |
| Ag2-Cu3 (Ag4'-Ag5')        | 4.204                                            | 4.796            |                                                  |                        |
| Cu2-Cu3 (Ag3'-Ag5')        | 8.19                                             | 9.514            |                                                  |                        |
| Cu4-Ag3 (Ag7'-Ag6')        | 3.998                                            | 4.797            | 0.019                                            | 0.097                  |
| Ag3-Cu3 (Ag6'-Ag5')        | 4.122                                            | 4.953            |                                                  |                        |
| Cu4-Cu3 (Ag7'-Ag5')        | 8.101                                            | 9.653            |                                                  |                        |
| Cu6-Ag5 (Ag11'-Ag10')      | 3.998                                            | 4.797            | 0.019                                            | 0.097                  |
| Ag5-Cu5 (Ag10'-Ag9')       | 4.122                                            | 4.953            |                                                  |                        |
| Cu6-Cu5 (Ag11'-Ag9')       | 8.101                                            | 9.653            |                                                  |                        |
| Cu6-Ag6 (Ag11'-Ag12')      | 4.204                                            | 4.795            | 0.02                                             | 0.097                  |
| Ag6-Cu7 (Ag12'-Ag13')      | 4.006                                            | 4.953            |                                                  |                        |
| Cu6-Cu7 (Ag11'-Ag13')      | 8.19                                             | 9.651            |                                                  |                        |
| Cu5-Ag8 (Ag9'-Ag16')       | 4.204                                            | 4.796            | 0.02                                             | 0.12                   |
| Ag8-Cu8 (Ag16'-Ag15')      | 4.006                                            | 4.838            |                                                  |                        |
| Cu5-Cu8 (Ag9'-Ag15')       | 8.19                                             | 9.514            |                                                  |                        |
| Cu2-Ag11 (Ag3'-Ag19')      | 4.121                                            | 4.953            | 0.022                                            | 0.098                  |
| Ag11-Cu6 (Ag19'-Ag11')     | 4.121                                            | 4.796            |                                                  |                        |
| Cu2-Cu6 (Ag3'-Ag11')       | 8.22                                             | 9.651            |                                                  |                        |
| Cu8-Ag10 (Ag15'-Ag18')     | 4.121                                            | 4.953            | 0.022                                            | 0.098                  |
| Ag10-Cu4 (Ag18'-Ag7')      | 4.121                                            | 4.796            |                                                  |                        |
| Cu8-Cu4 (Ag15'-Ag7')       | 8.22                                             | 9.651            |                                                  |                        |
| Cu3-Ag12 (Ag5'-Ag20')      | 4.044                                            | 4.838            | 0.025                                            | 0.12                   |
| Ag12-Cu7 (Ag20'-Ag13')     | 4.044                                            | 4.796            |                                                  |                        |
| Cu3-Cu7 (Ag5'-Ag13')       | 8.063                                            | 9.514            |                                                  |                        |
| Cu5-Ag9 (Ag9'-Ag17')       | 4.044                                            | 4.838            | 0.025                                            | 0.12                   |
| Ag9-Cu1 (Ag17'-Ag1')       | 4.044                                            | 4.796            |                                                  |                        |
| Cu5-Cu1 (Ag9'-Ag1')        | 8.063                                            | 9.514            |                                                  |                        |

**Table S5** Comparing the angular deviations on the edges of the cubic structures between  $\text{Ag}_{55}\text{Cu}_8\text{I}_{12}$  and  $\text{Ag}_{63}$ .

| Cluster<br>Bond angle (°)       | $\text{Ag}_{55}\text{Cu}_8\text{I}_{12}$ | $\text{Ag}_{63}$ | $\text{Ag}_{55}\text{Cu}_8\text{I}_{12}$ | $\text{Ag}_{63}$      |
|---------------------------------|------------------------------------------|------------------|------------------------------------------|-----------------------|
|                                 |                                          |                  | diff. (%)                                | diff.(%)              |
|                                 |                                          |                  | i.e. (180-172.17)/180                    | i.e. (180-161.89)/180 |
| Cu1-Ag1-Cu2 (Ag1'-Ag2'-Ag3')    | 172.17                                   | 161.89           | 4.35                                     | 10.06                 |
| Cu7-Ag7-Cu8 (Ag13'-Ag14'-Ag15') | 172.17                                   | 161.89           | 4.35                                     | 10.06                 |
| Cu1-Ag4-Cu4 (Ag1'-Ag8'-Ag7')    | 171.97                                   | 163.72           | 4.46                                     | 9.04                  |
| Cu2-Ag2-Cu3 (Ag3'-Ag4'-Ag5')    | 171.97                                   | 161.89           | 4.46                                     | 10.06                 |
| Cu4-Ag3-Cu3 (Ag7'-Ag6'-Ag5')    | 172.17                                   | 163.73           | 4.35                                     | 9.04                  |
| Cu6-Ag5-Cu5 (Ag11'-Ag10'-Ag9')  | 172.17                                   | 163.73           | 4.35                                     | 9.04                  |
| Cu6-Ag6-Cu7 (Ag11'-Ag12'-Ag13') | 171.97                                   | 163.72           | 4.46                                     | 9.04                  |
| Cu5-Ag8-Cu8 (Ag9'-Ag16'-Ag15')  | 171.97                                   | 161.89           | 4.46                                     | 10.06                 |
| Cu2-Ag11-Cu6 (Ag3'-Ag19'-Ag11') | 171.52                                   | 163.71           | 4.71                                     | 9.05                  |
| Cu8-Ag10-Cu4 (Ag15'-Ag18'-Ag7') | 171.52                                   | 163.71           | 4.71                                     | 9.05                  |
| Cu3-Ag12-Cu7 (Ag5'-Ag20'-Ag13') | 170.94                                   | 161.89           | 5.03                                     | 10.06                 |
| Cu5-Ag9-Cu1 (Ag9'-Ag17'-Ag1')   | 170.94                                   | 161.89           | 5.03                                     | 10.06                 |

## 4. References

- [S1] H. Yang, J. Yan, Y. Wang, H. Su, L. Gell, X. Zhao, C. Xu, B. K. Teo, H. Hakkinen and N. Zheng, *J. Am. Chem. Soc.*, 2017, **139**, 31-34.
